# Supplementary material
Source: HighWire-hosted journal article supplement (https://care.diabetesjournals.org/content/suppl/2009/10/01/dc09-1253)
Supplement: dc09-1253_online_appendix.pdf [file dc09-1253_online_appendix.pdf]

**Supplementary Table 1. Median values for aorta, carotid and coronary artery calcified plaque, by quartile of urine albumin:creatinine ratio**

| Variable    | Ethnicity         | ACR≤Q1     | Q1<ACR≤Q2  | Q2<ACR≤Q3  | ACR>Q3 | p-value              |
|-------------|-------------------|------------|------------|------------|--------|----------------------|
| Aorta CP    | African American  | 574.5      | 1350       | 564        | 1146   | 0.177                |
| Carotid CP  | African American  | 0          | 0.5        | 2.75       | 20.5   | 0.009                |
| Coronary CP | African American  | 20.5       | 54         | 53.5       | 106.8  | 0.061                |
| Aorta CP    | European American | 2110.5     | 2675.5     | 4846       | 6472   | 4.7x10 <sup>-7</sup> |
| Carotid CP  | European American | 9.5        | 19.5       | 55.8       | 115    | 1.2x10 <sup>-8</sup> |
| Coronary CP | European American | 164.25     | 187        | 365.5      | 583.5  | 4.8x10 <sup>-5</sup> |
|             |                   |            |            |            |        |                      |
|             |                   | Quartile 1 | Quartile 2 | Quartile 3 |        |                      |
| ACR, mg/g   | African American  | 5.8        | 17.5       | 62.8       |        |                      |
| ACR, mg/g   | European American | 6.2        | 13.4       | 39.4       |        |                      |

CP=Calcified plaque; Q=quartile; ACR=Albumin:Creatinine Ratio
